# Supplementary material for: Hollow-structure engineering of a silicon–carbon anode for ultra-stable lithium-ion batteries
Source: Royal Society of Chemistry journal article supplement (doi:10.1039/d0dt00566e), 2020-01-01
Supplement: d0dt00566e1.pdf [file d0dt00566e1.pdf]

Electronic Supplementary Material (ESI)

## Hollow-Structure Engineering of Silicon-Carbon Anode for Ultra-Stable Lithium-ion Batteries

Hongbin Liu,<sup>a</sup> Yun Chen,<sup>a</sup> Bo Jiang,<sup>a</sup> Yue Zhao,<sup>a</sup> Xiaolin Guo<sup>\*b</sup> and Tingli Ma<sup>\*a,b</sup>

<sup>a</sup> Graduate School of Life Science and Systems Engineering, Kyushu Institute of Technology 2-4 Hibikino, Wakamatsu, Kitakyushu, Japan

E-mail: tinglima@life.kyutech.ac.jp

<sup>b</sup> College of Materials and Chemistry, China Jiliang University, Hangzhou, 310018, PR China

E-mail: guoxiaolin@cjlu.edu.cn

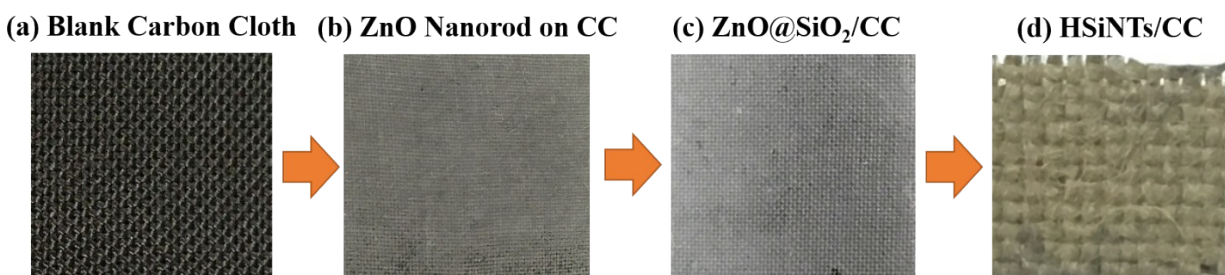

**Figure S1.** The photo image of several materials: (a) The blank carbon cloth; (b) growing ZnO nanorods on carbon cloth; (c) coating SiO<sub>2</sub> on ZnO nanorods; and (d) The final HSiNTs/CC material.

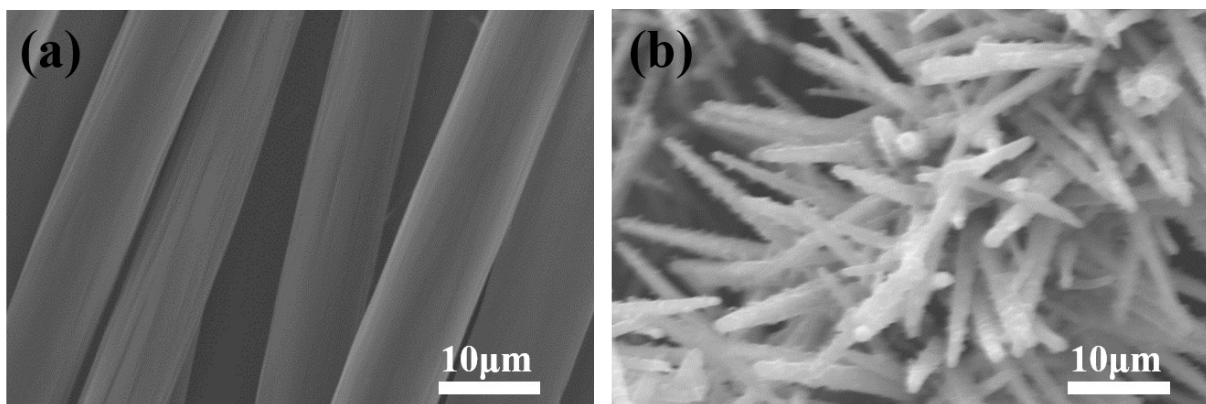

**Figure S2.** The SEM images of (a) Blank carbon cloth (CC); (b) ZnO@Si/CC.

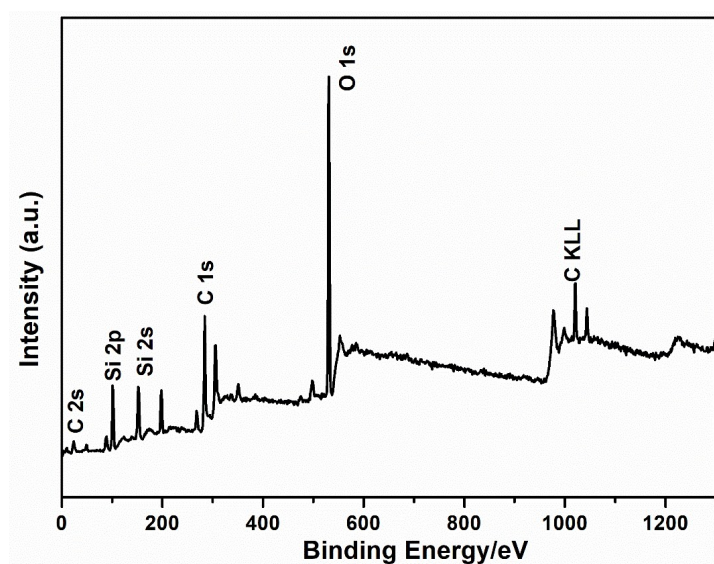

**Figure S3.** The whole XPS spectra of the HSiNts/CC.

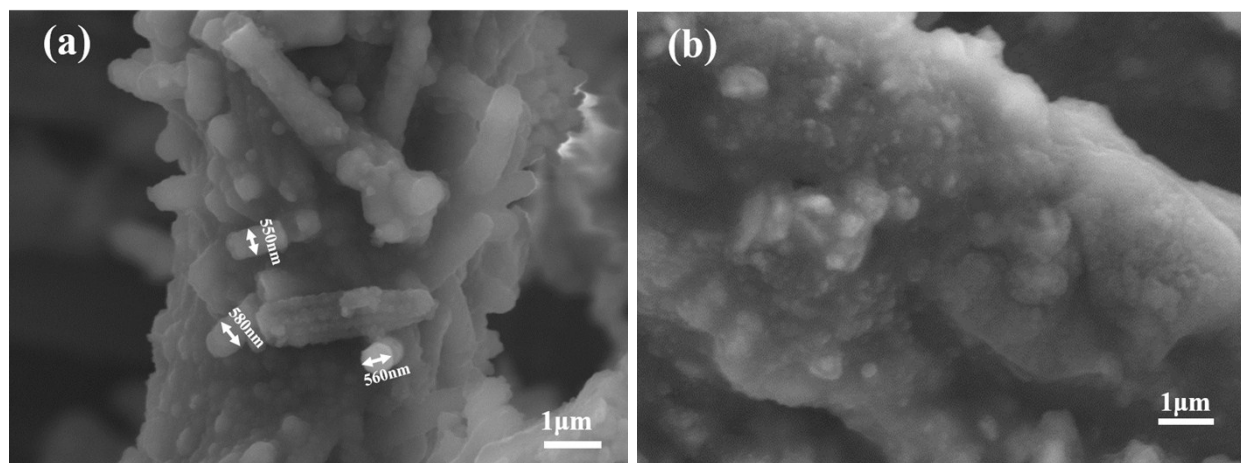

Figure S4. The SEM images of HSiNTs/CC (a) and pure Si/CC (b) after 100 cycles.

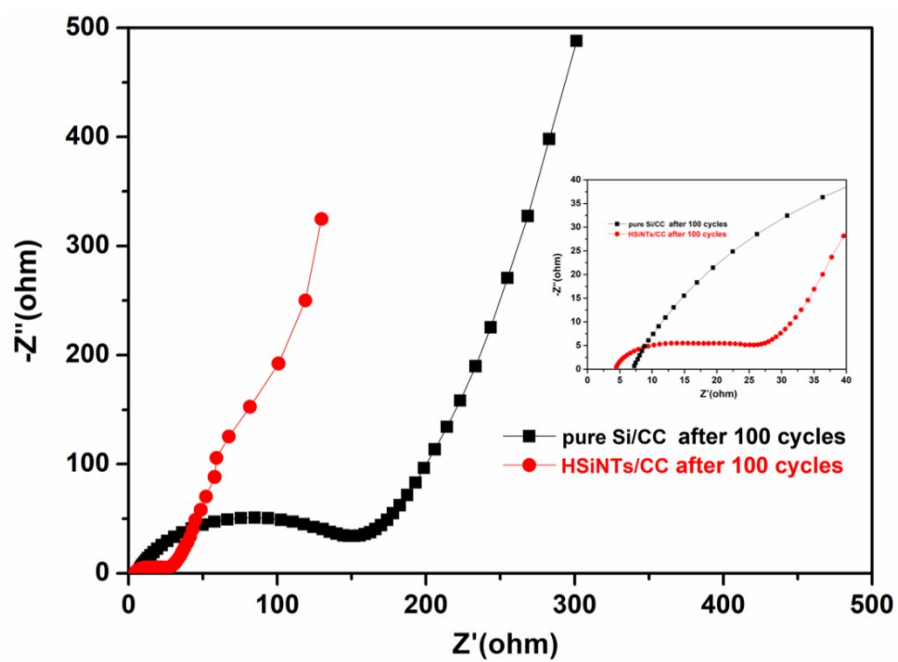

Figure S5. The EIS of HSiNTs/CC and pure Si/CC anode after 100 cycles.

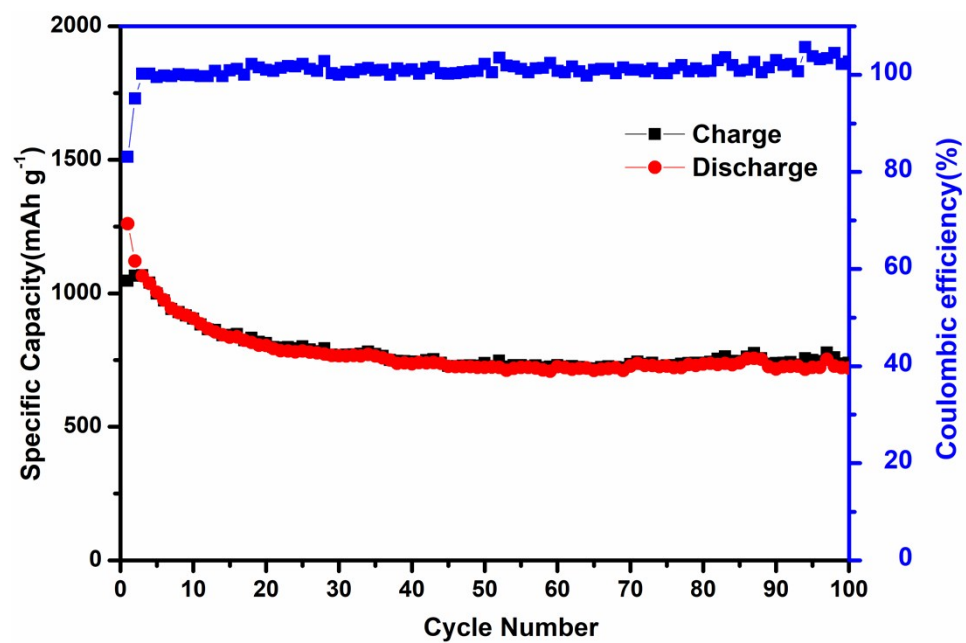

Figure S6. Cycling performance of sample without etching ZnO at  $1000 \text{ mA g}^{-1}$  between the range of 0.01-3.0V. The specific capacity of ZnO@Si/CC anode declines continuously during the cycling.
